# Supplementary material for: Smartphone-based portable photoelectrochemical biosensing system for point-of-care detection of urine creatinine and albumin
Source: Royal Society of Chemistry journal article supplement (doi:10.1039/d3lc00238a), 2023-01-01
Supplement: d3lc00238a1.pdf [file d3lc00238a1.pdf]

**Supplementary Material for**  
**“Smartphone-based portable photoelectrochemical**  
**biosensing system for point-of-care detection of urine**  
**creatinine and albumin”**

Zhenghan Shi <sup>a, b</sup>, Chaobo Dai <sup>a</sup>, Peixue Deng <sup>d</sup>, Yue Wu <sup>a</sup>, Guang Liu <sup>a</sup>, Zijian An <sup>a</sup>, Hao  
Liang <sup>d</sup>, Fenni Zhang <sup>a</sup>, Yanli Lu <sup>a, c, \*</sup>, Qingjun Liu <sup>a, b \*</sup>

<sup>a</sup> Zhejiang University, Biosensor National Special Laboratory, Key Laboratory for Biomedical Engineering of Education Ministry, Department of Biomedical Engineering, Hangzhou, 310027, P. R. China

<sup>b</sup> Research Institute of Zhejiang University-Taizhou, Taizhou, 318000, P. R. China

<sup>c</sup> Intelligent Perception Research Institute, Zhejiang Lab, Hangzhou, 311100 P. R. China

<sup>d</sup> Life Sciences Institute, Guangxi Key Laboratory of AIDS Prevention and Treatment, Guangxi Medical University, Nanning, Guangxi, 530021 P. R. China

\* Corresponding Author: Yanli Lu, Qingjun Liu  
E-mail address: yanlilu@zju.edu.cn (Y. Lu), qjliu@zju.edu.cn (Q. Liu).

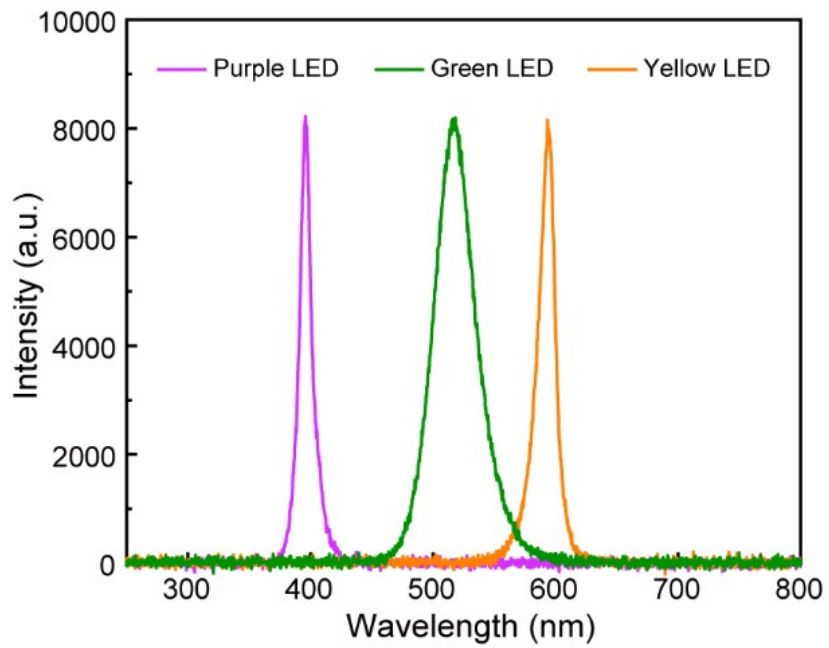

**Figure S1.** Emission spectra of different LEDs (purple, blue, and green).

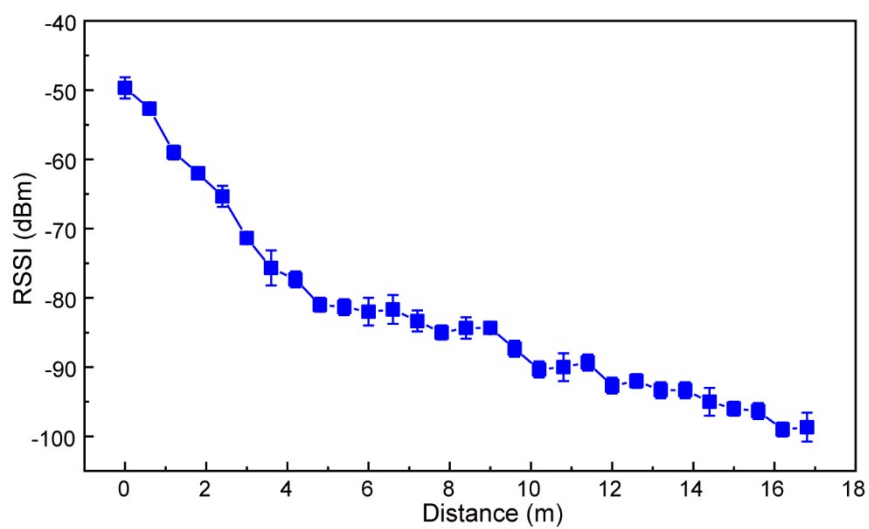

**Figure S2.** The Received Signal Strength Indicator (RSSI) of Bluetooth connection under sequentially increased distance between the portable photoelectrochemical (PEC) biosensing system and the smartphone.

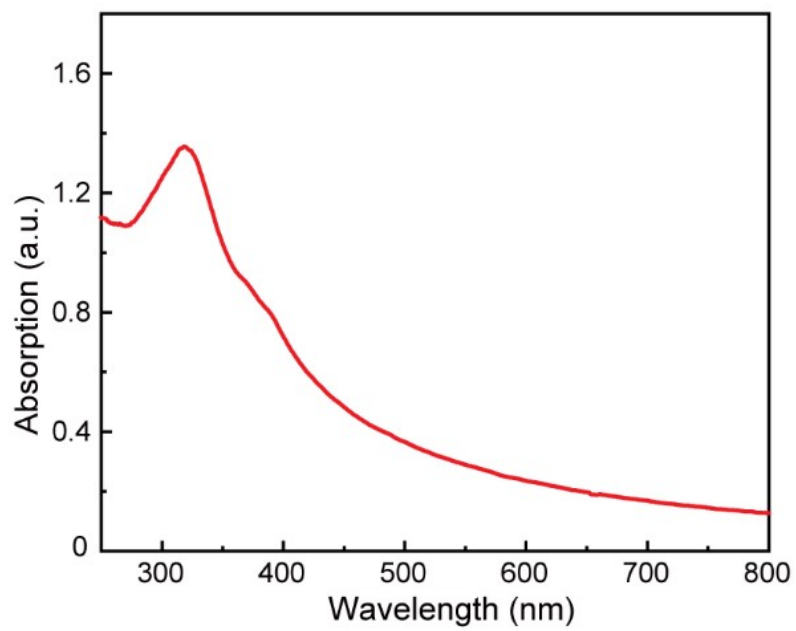

**Figure S3.** UV-vis absorption spectroscopy of the prepared graphitic carbon nitride.

**Table S1.** Performances of the developed PEC biosensing system compared with previously reported methods for creatinine and albumin detection.

| Target               | LOD                                              | Detection range                                              | Detection method          | Device                                          | Refs.            |
|----------------------|--------------------------------------------------|--------------------------------------------------------------|---------------------------|-------------------------------------------------|------------------|
| Creatinine           | 0.001 µg/mL                                      | 0.001-2 µg/mL                                                | LC-MS/MS                  | Triple quadrupole tandem mass spectrometer      | [1]              |
|                      | 2.5 µg/mL                                        | 2.1-378.5 µg/mL                                              | Colorimetry               | Clinical chemistry analyzer                     | [2]              |
|                      | 0.085 µg/mL                                      | 0.085–56.55 µg/mL                                            | Capillary electrophoresis | Capillary electrophoresis system                | [3]              |
|                      | 0.068 µg/mL                                      | 0.25-15 µg/mL                                                | Electrochemistry          | Electrochemical workstation                     | [4]              |
| Albumin              | 2.72 µg/mL                                       | 8.4-3465 µg/mL                                               | HPLC                      | High performance liquid chromatograph           | [5]              |
|                      | 3 µg/mL                                          | 3-30 µg/mL                                                   | SERS spectroscopy         | Raman spectrometer                              | [6]              |
|                      | 0.014 µg/mL                                      | 0-230 µg/mL                                                  | Fluorescence              | Spectrofluorometer                              | [7]              |
|                      | 9.7 µg/mL                                        | 10-300 µg/mL                                                 | Electrochemistry          | Electrochemical workstation                     | [8]              |
| Creatinine & Albumin | 1.47 µg/mL (Creatinine);<br>0.10 µg/mL (Albumin) | 3.39-113.12 µg/mL (Creatinine);<br>0.33-9.97 µg/mL (Albumin) | Fluorescence              | Spectrofluorometer                              | [9]              |
|                      | -                                                | 94-2537 µg/mL (Creatinine);<br>10-100 µg/mL (Albumin)        | Electrochemistry          | Portable wireless urine detection system        | [10]             |
|                      | 93 µg/mL (Creatinine);<br>63 µg/mL (Albumin)     | 100-2000 µg/mL (Creatinine);<br>10-300 µg/mL (Albumin)       | Electrochemistry          | Battery-free and wireless tag                   | [11]             |
|                      | 27.9 µg/mL (Creatinine);<br>1.5 µg/mL (Albumin)  | 100-1500 µg/mL (Creatinine);<br>9.9-500 µg/mL (Albumin)      | Photoelectrochemistry     | Portable photoelectrochemical biosensing system | <b>This work</b> |

Abbreviations: PEC, photoelectrochemical. LOD, limit of detection. LC-MS/MS, Liquid chromatography tandem mass spectrometry. HPLC, High performance liquid chromatograph. SERS, surface-enhanced Raman scattering.

**Table S2.** Performances of the developed PEC biosensing system compared with the reported POC devices for creatinine and albumin detection.

| Target                     | LOD                                              | Detection range                                          | Detection method      | Device                                           | Refs.            |
|----------------------------|--------------------------------------------------|----------------------------------------------------------|-----------------------|--------------------------------------------------|------------------|
| Creatinine                 | 30.54 µg/mL                                      | 92.76-1131.2 µg/mL                                       | Colorimetry           | Paper-based sensors and smartphone               | [12]             |
|                            | 233.59 µg/mL                                     | 0–3393.6 µg/mL                                           | Electrochemistry      | NFC-based potentiostat                           | [13]             |
|                            | 4.22 µg/mL                                       | 56.56–3959.2 µg/mL                                       | Electrochemistry      | 3D-printed sensors and a portable potentiostat   | [14]             |
| Albumin                    | 1.78 µg/mL                                       | 5-100 µg/mL                                              | Electrochemistry      | Hand-held EIS detector                           | [15]             |
|                            | 78.125 µg/mL                                     | 78.125-40000 µg/mL                                       | Colorimetry           | Urine test strips and smartphone                 | [16]             |
|                            | 4.1 µg/mL                                        | 0-66.48 µg/mL                                            | Fluorescence          | UV lamp, a dark box and smartphone               | [17]             |
| Creatinine<br>&<br>Albumin | 41.2 µg/mL (Creatinine);<br>13.5 µg/mL (Albumin) | 500-3500 µg/mL (Creatinine);<br>200-5000 µg/mL (Albumin) | Colorimetry           | Paper-based sensor and opto-electrochemical unit | [18]             |
|                            | -                                                | 94-2537 µg/mL (Creatinine);<br>10-100 µg/mL (Albumin)    | Electrochemistry      | Portable wireless urine detection system         | [10]             |
|                            | 93 µg/mL (Creatinine);<br>63 µg/mL (Albumin)     | 100-2000 µg/mL (Creatinine);<br>10-300 µg/mL (Albumin)   | Electrochemistry      | Battery-free and wireless tag                    | [11]             |
|                            | 27.9 µg/mL (Creatinine);<br>1.5 µg/mL (Albumin)  | 100-1500 µg/mL (Creatinine);<br>9.9-500 µg/mL (Albumin)  | Photoelectrochemistry | Portable photoelectrochemical biosensing system  | <b>This work</b> |

Abbreviations: PEC, photoelectrochemical. POC, point-of-care. LOD, limit of detection. NFC, near-field communication. EIS, electrochemical impedance spectroscopy. UV, ultraviolet.

## Reference:

- [1] E.-K. Park, T. Watanabe, S.J. Gee, M.B. Schenker, B.D. Hammock, Creatinine measurements in 24 h urine by liquid chromatography-tandem mass spectrometry, *J Agr Food Chem*, 56(2008) 333-336.
- [2] T. Kume, B. Saglam, C. Ergon, A.R. Sisman, Evaluation and comparison of Abbott Jaffe and enzymatic creatinine methods: Could the old method meet the new requirements?, *J Clin Lab Anal*, 32(2018) e22168.
- [3] E.A. Clark, J.C. Fanguy, C.S. Henry, High-throughput multi-analyte screening for renal disease using capillary electrophoresis, *J Pharmaceut Biomed*, 25(2001) 795-801.
- [4] C.H. Chen, M.S. Lin, A novel structural specific creatinine sensing scheme for the determination of the urine creatinine, *Biosens Bioelectron*, 31(2012) 90-94.
- [5] E. Klapkova, M. Fortova, R. Prusa, L. Moravcova, K. Kotaska, Determination of urine albumin by new simple high-performance liquid chromatography method, *J Clin Lab Anal*, 30(2016) 1226-1231.
- [6] A. Stefancu, V. Moisoiu, C. Bocsa, Z. Balint, D.T. Cosma, I.A. Veresiu, et al., SERS-based quantification of albuminuria in the normal-to-mildly increased range, *Analyst*, 143(2018) 5372-5379.
- [7] Y. Tu, Y. Yu, Z. Zhou, S. Xie, B. Yao, S. Guan, et al., Specific and quantitative detection of albumin in biological fluids by tetrazolate-functionalized water-soluble AIEgens, *ACS Appl Mater Interfaces*, 11(2019) 29619-29629.
- [8] J.Z. Tsai, C.J. Chen, K. Settu, Y.F. Lin, C.L. Chen, J.T. Liu, Screen-printed carbon electrode-based electrochemical immunosensor for rapid detection of microalbuminuria, *Biosens Bioelectron*, 77(2016) 1175-1182.
- [9] S. Thammajinno, C. Buranachai, P. Kanatharana, P. Thavarungkul, C. Thammakhet-Buranachai, A copper nanoclusters probe for dual detection of microalbumin and creatinine, *Spectrochim Acta A Mol Biomol Spectrosc*, 270(2022) 120816.
- [10] S.Y. Lee, H.Y. Lee, D.S. Ciou, Z.X. Liao, P.W. Huang, Y.T. Hsieh, et al., A portable wireless urine detection system with power-efficient electrochemical readout ASIC and ABTS-CNT biosensor for UACR detection, *IEEE Trans Biomed Circuits Syst*, 15(2021) 537-548.
- [11] Y. Jia, G. Liu, G. Xu, X. Li, Z. Shi, C. Cheng, et al., Battery-free and wireless tag for in situ sensing of urinary albumin/creatinine ratio (ACR) for the assessment of albuminuria, *Sensor Actuat B-Chem*, 367(2022) 132050.
- [12] I. Lewińska, M. Speichert, M. Granica, Ł. Tymecki, Colorimetric point-of-care paper-based sensors for urinary creatinine with smartphone readout, *Sensor Actuat B-Chem: Chemical*, 340(2021) 129915.
- [13] T. Hongboontry, S. Ponwaranon, S. Sirijongdee, C. Thanachayanont, P. Pungetmongkol, Low-cost and portable creatinine electrochemical sensor for non-invasive chronic kidney disease monitoring, 2021 IEEE 21st International Conference on Nanotechnology (NANO)2021, pp. 159-162.
- [14] K. Teekayupak, C. Aumnate, A. Lomae, P. Preechakasedkit, C.S. Henry, O. Chailapakul, et al., Portable smartphone integrated 3D-Printed electrochemical sensor for nonenzymatic determination of creatinine in human urine, *Talanta*, 254(2023) 124131.
- [15] D. Zhang, Y. Lu, Q. Zhang, L. Liu, S. Li, Y. Yao, et al., Protein detecting with smartphone-controlled electrochemical impedance spectroscopy for point-of-care applications, *Sensor*

Actuat B-Chem, 222(2016) 994-1002.

[16] R. Thakur, P. Maheshwari, S.K. Datta, S.K. Dubey, C. Shakher, Machine learning-based rapid diagnostic-test reader for albuminuria using smartphone, IEEE Sens J, 21(2021) 14011-14026.

[17] X. Zhao, W. Zheng, T. Qin, X. Du, Y. Lei, T. Lv, et al., An anti-interference fluorescent probe for point-of-care diagnosis of albuminuria, Sensor Actuat B-Chem, 351(2022) 130980.

[18] N. Mandal, S. Dutta, A. Gupta, D. Bandyopadhyay, Paper-based sensors for point-of-care kidney function monitoring, IEEE Sens J, 20(2020) 9644-9651.
